# Supplementary material for: Model evaluation and inter-comparison of surface-level ozone and relevant species in East Asia in the context of MICS-Asia phase III Part I: overview
Source: Copernicus journal article supplement (doi:10.5194/acp-2018-1283), 2019-01-17
Supplement: Supplementary file 1 [file acp-2018-1283-supplement.pdf]

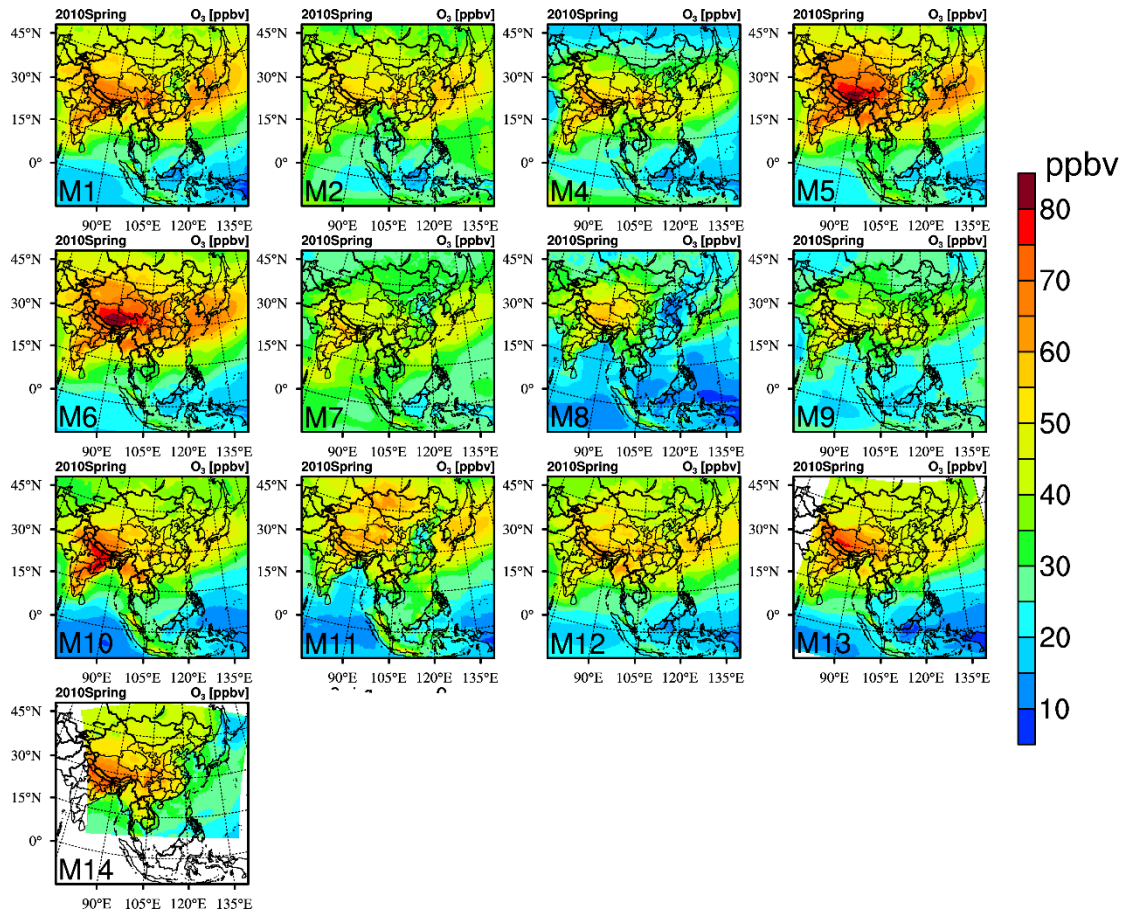

Fig.S1 Surface O<sub>3</sub> spatial distribution from 13 models for spring 2010 (unit:ppbv).

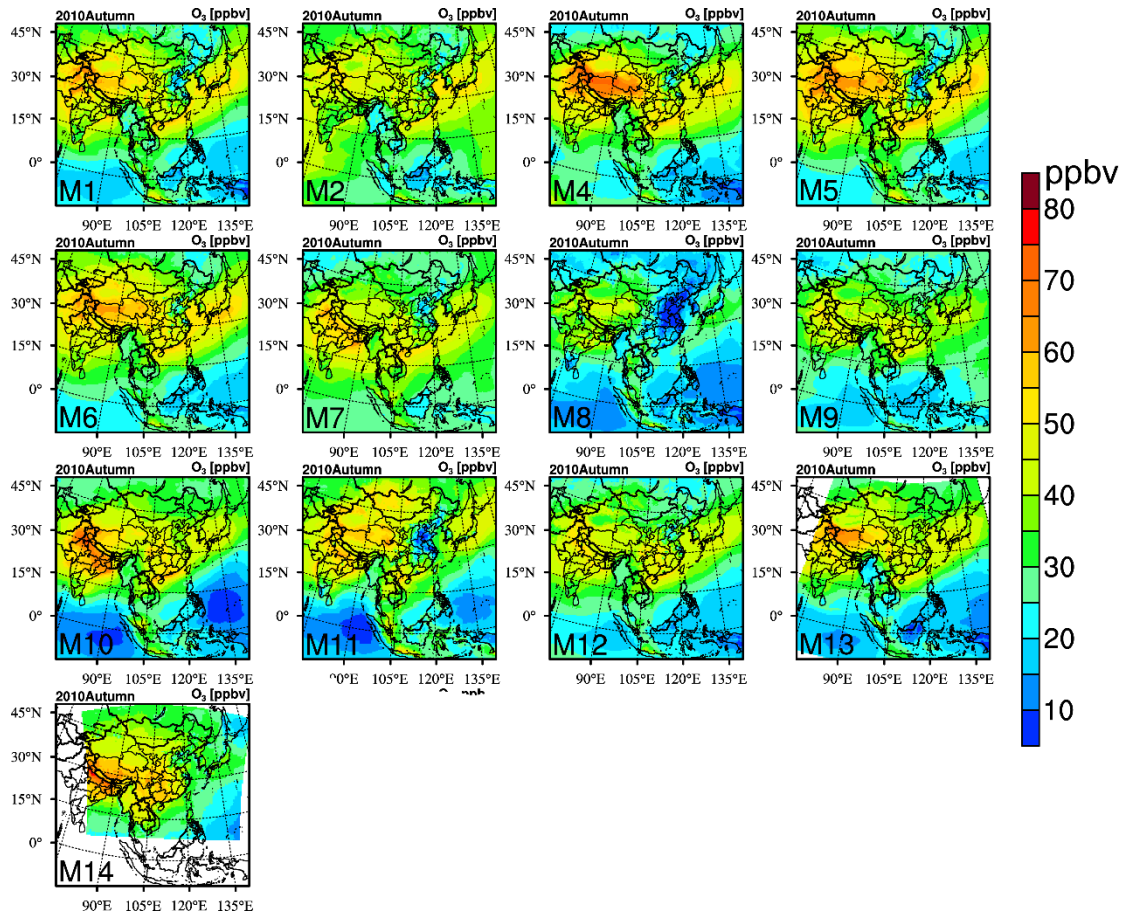

Fig.S2 Surface O<sub>3</sub> spatial distribution from 13 models for autumn 2010 (unit:ppbv).
